# Supplementary figures and images for: Monitoring egg fertility, embryonic morbidity, and mortality in an oviparous elasmobranch using ultrasonography
Source: Frontiers journal article supplement (doi:10.3389/fvets.2024.1410377), 2024-07-30

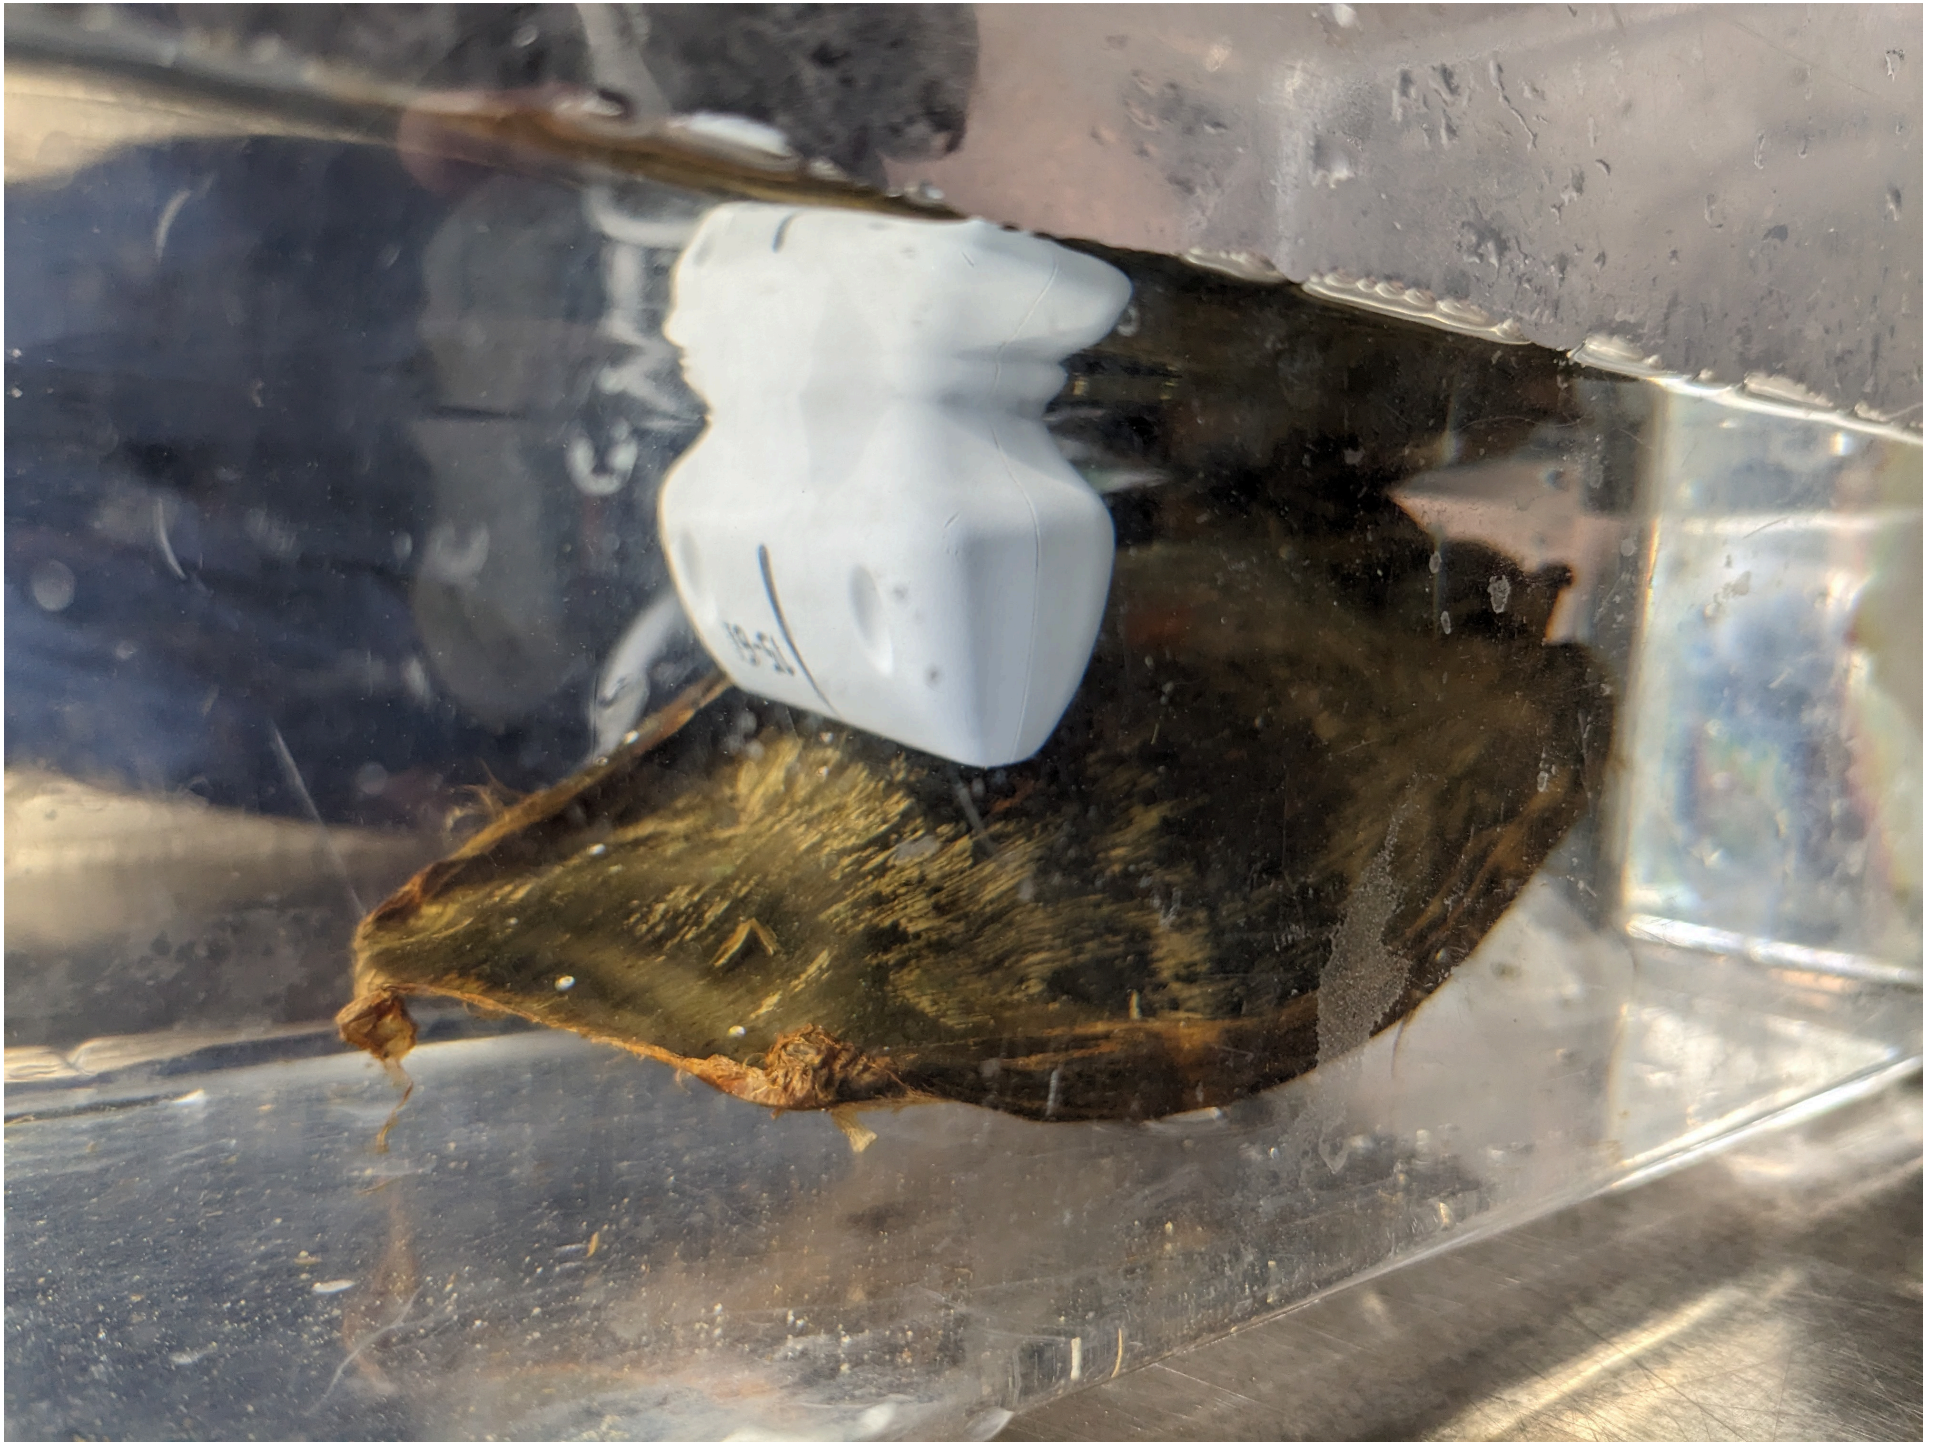

Supplement: Data_Sheet_1.zip [file Data_Sheet_1.zip]

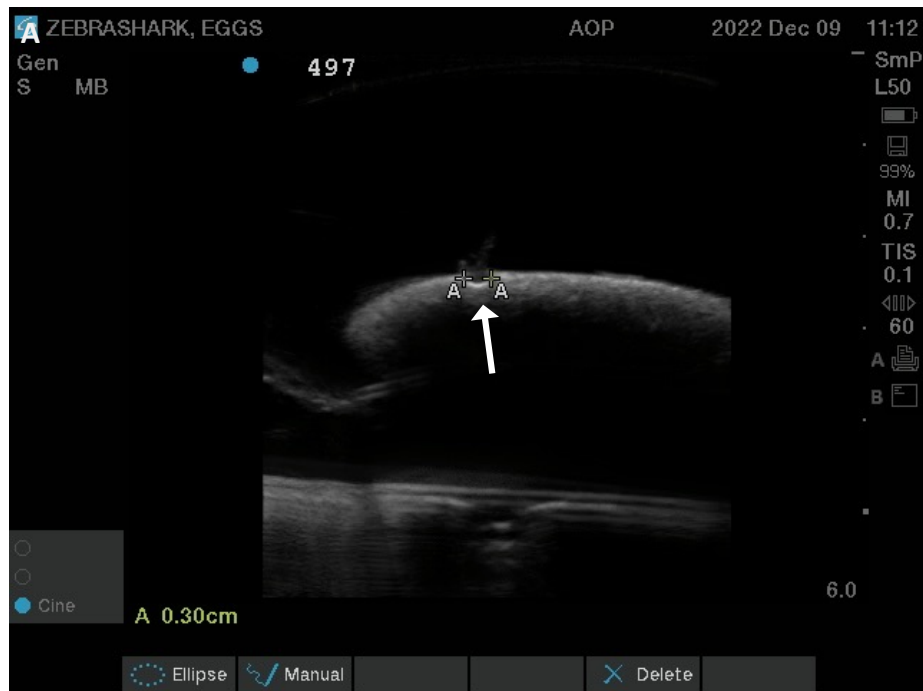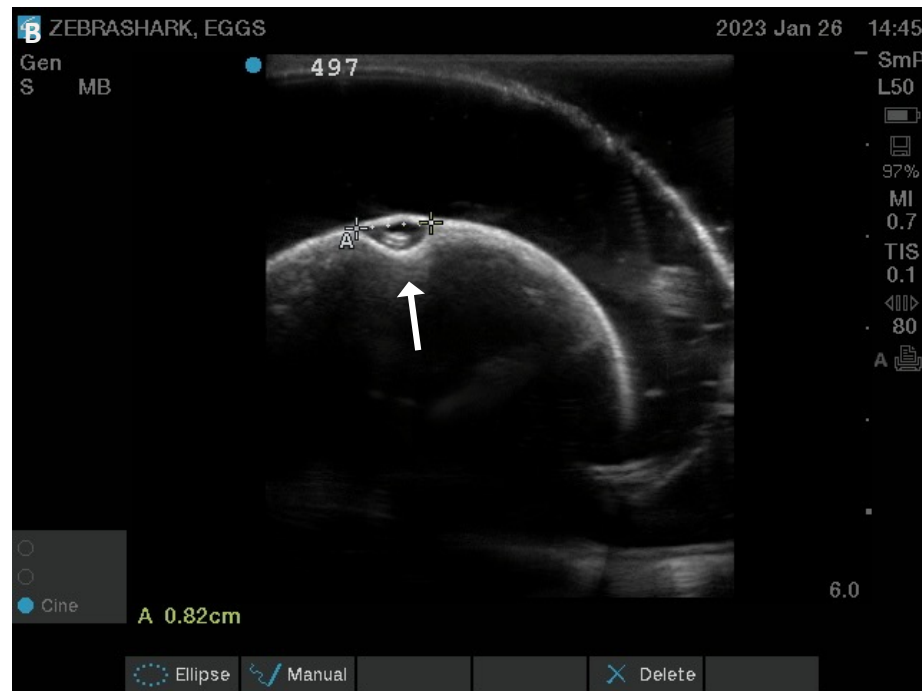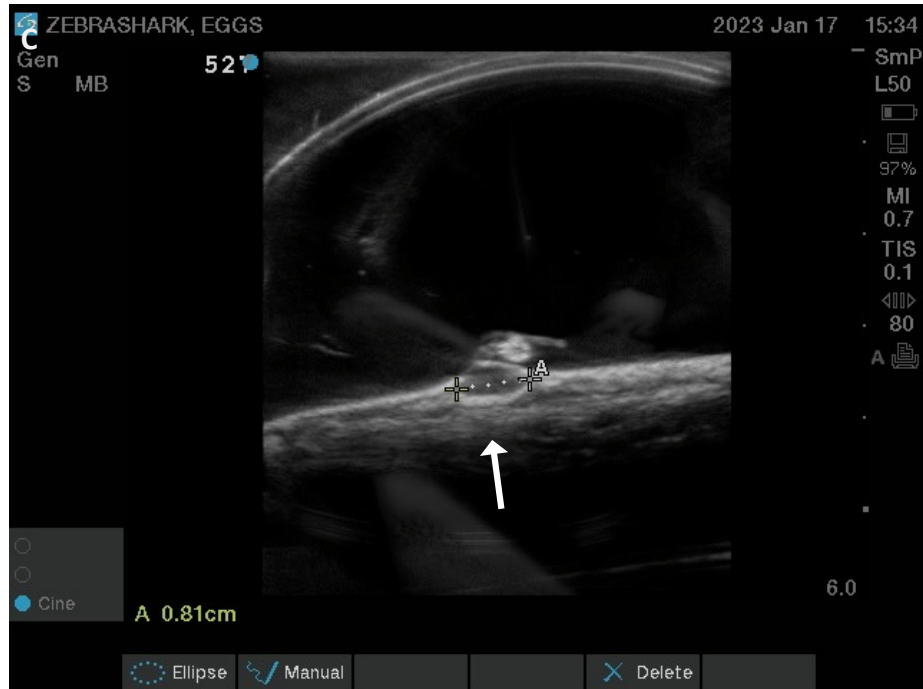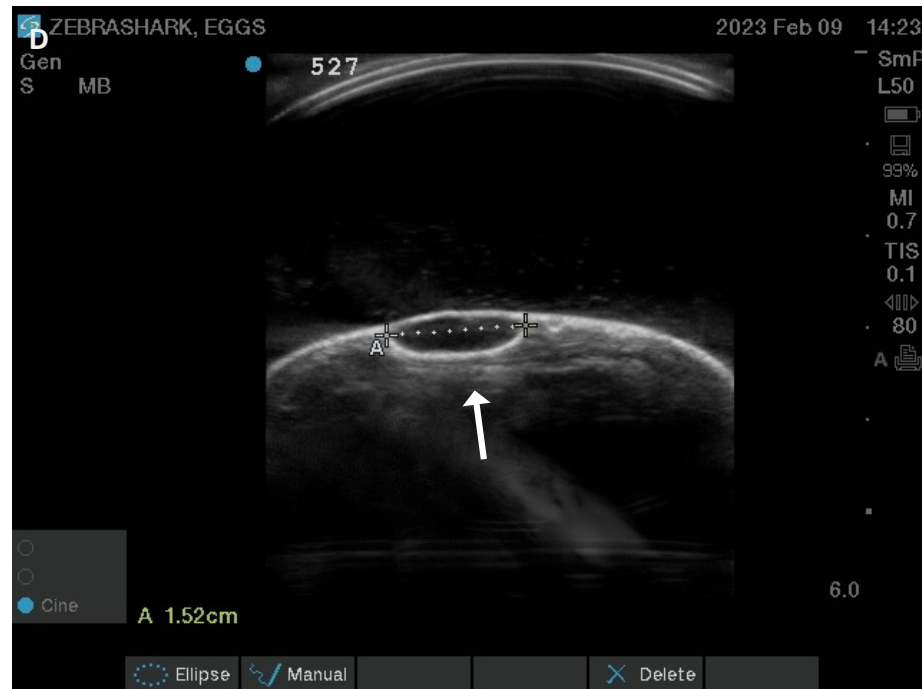

Supplement: Data_Sheet_1.zip [file Data_Sheet_1.zip]

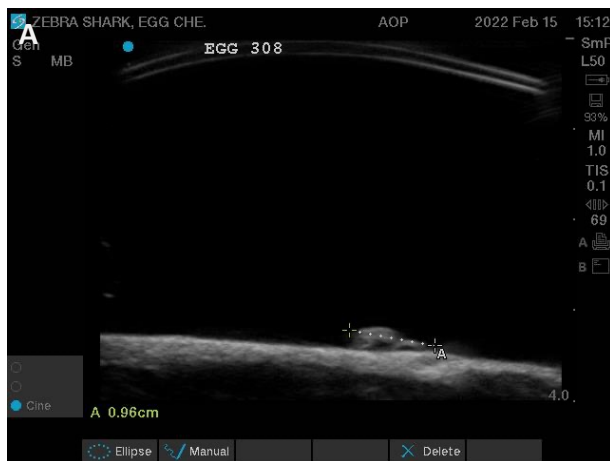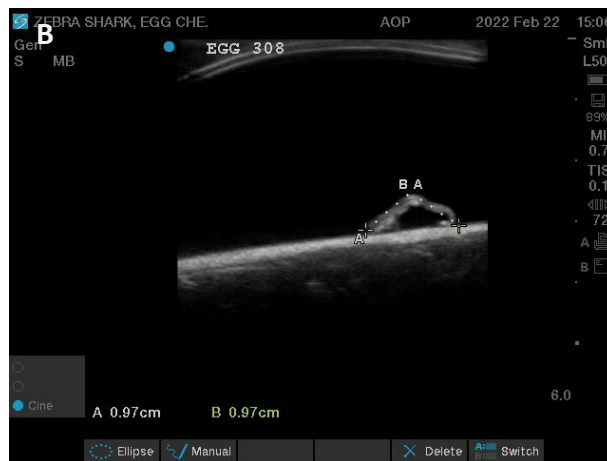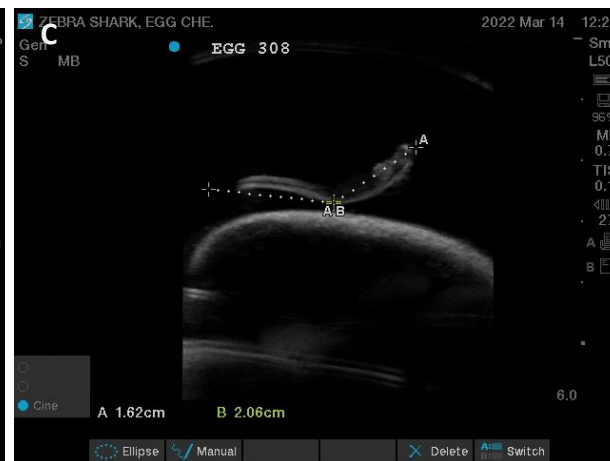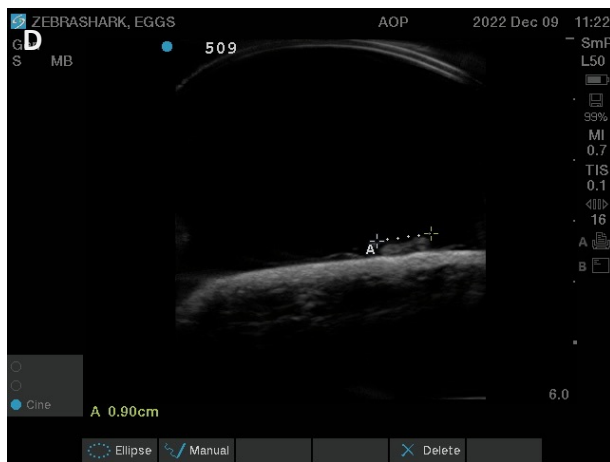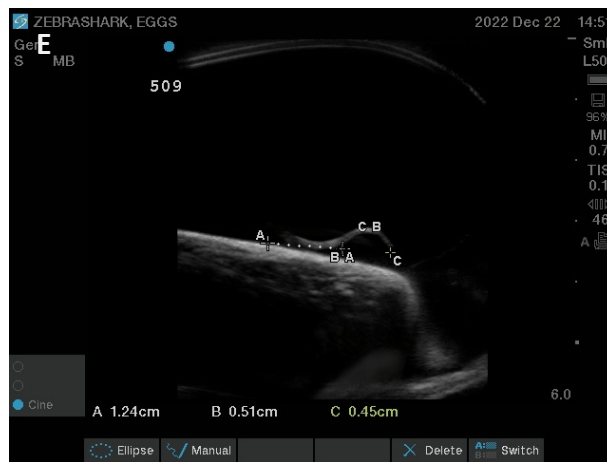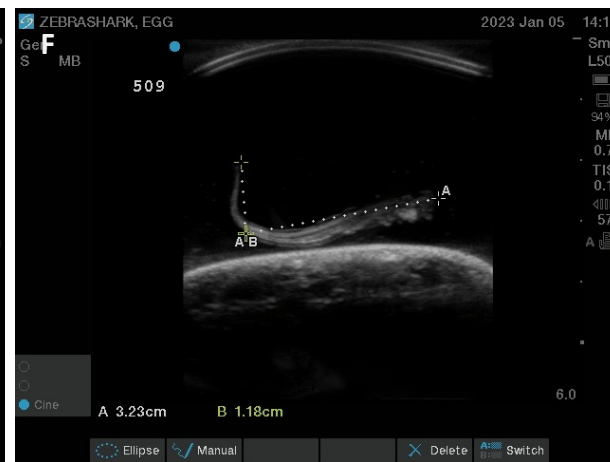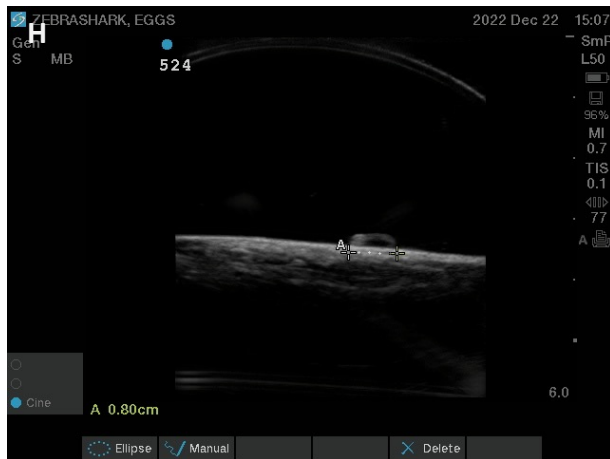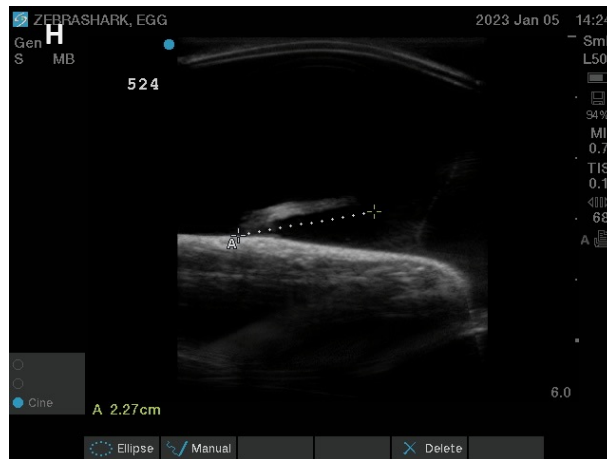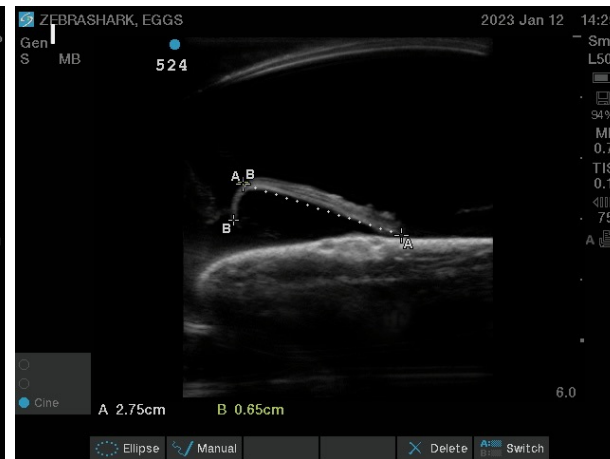

Supplement: Data_Sheet_1.zip [file Data_Sheet_1.zip]

Egg # 396

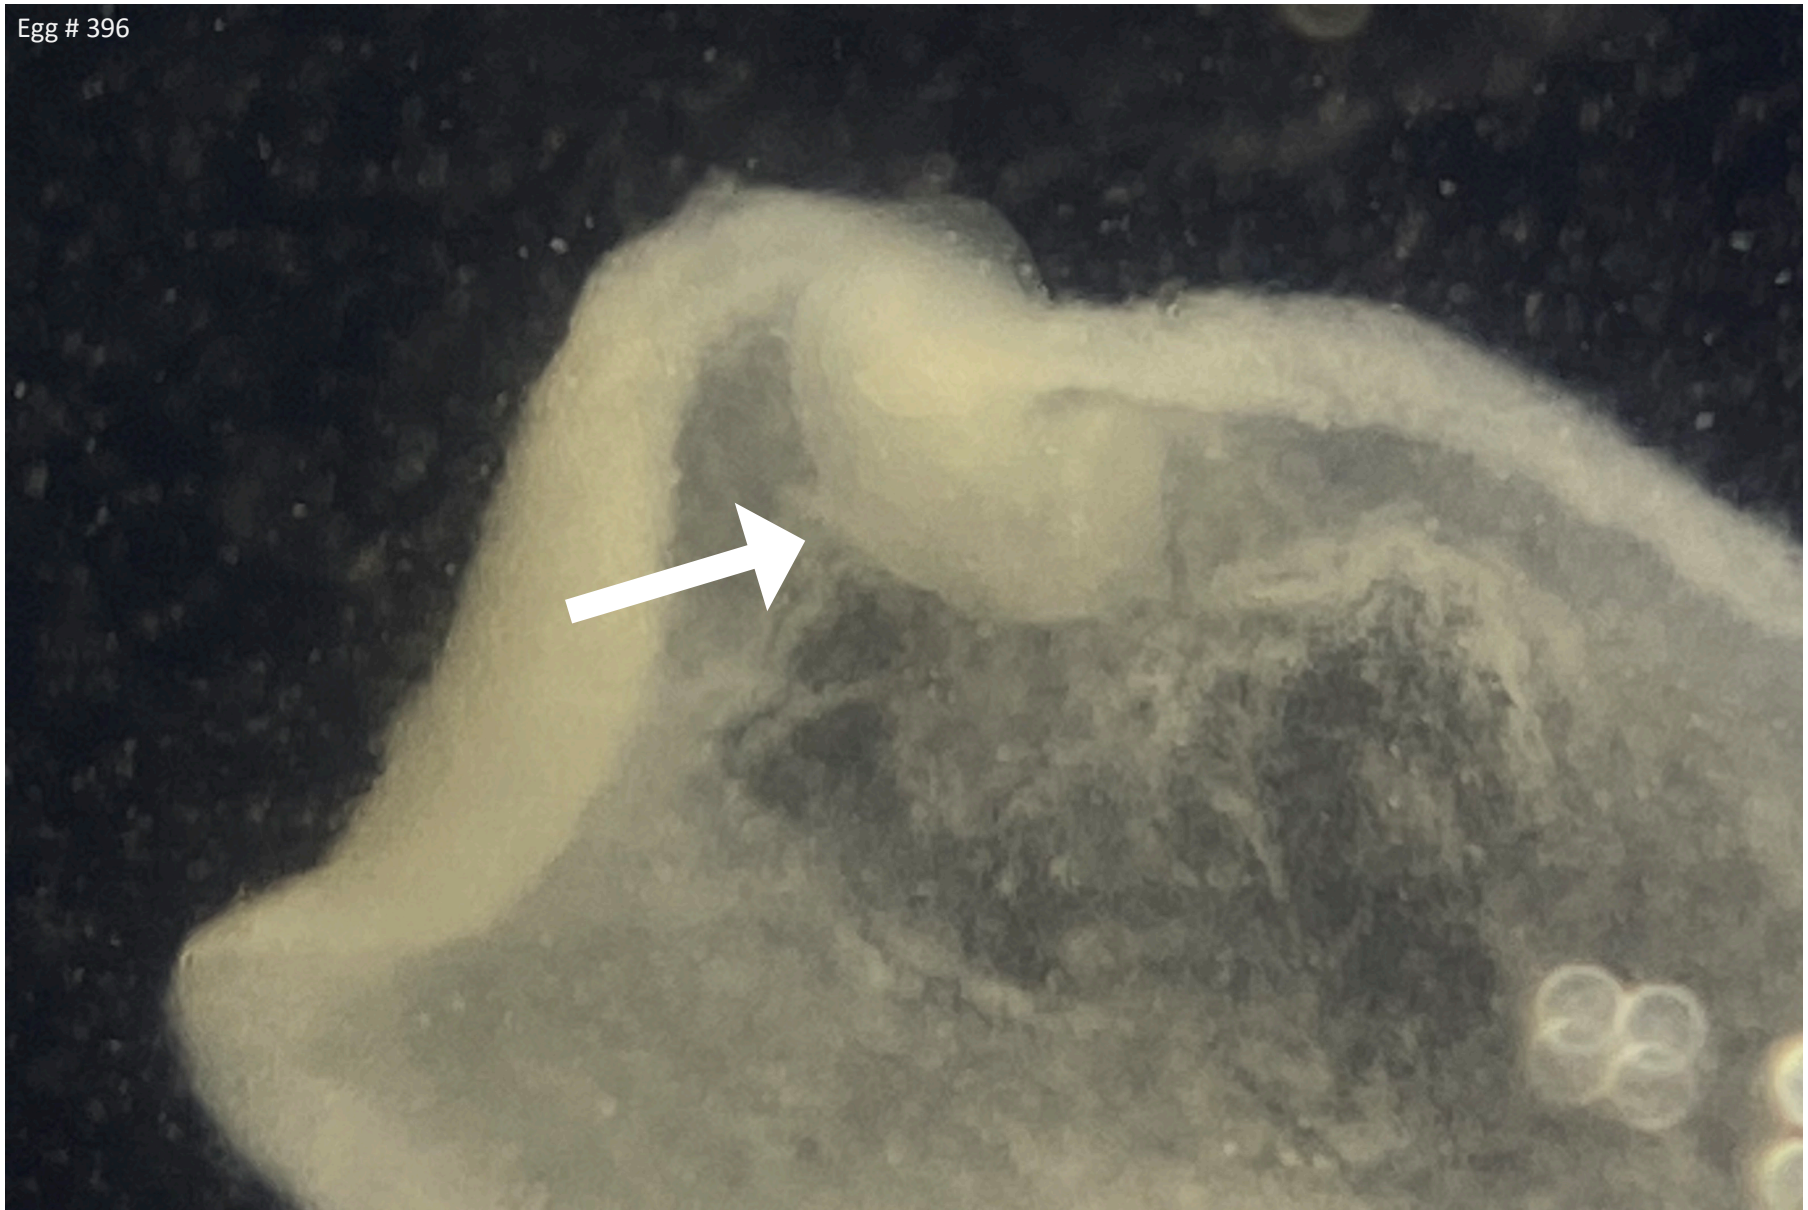

Supplement: Data_Sheet_1.zip [file Data_Sheet_1.zip]

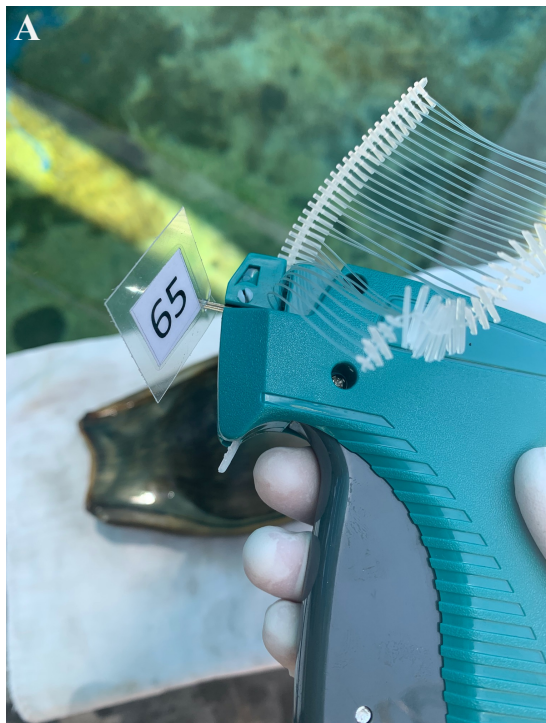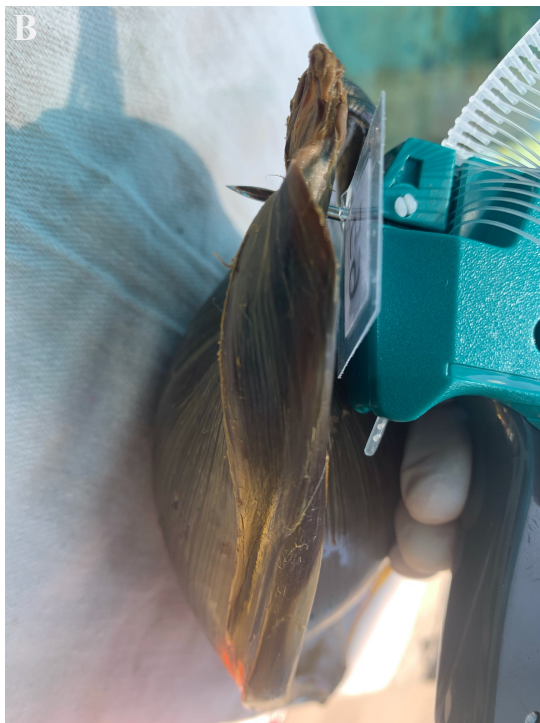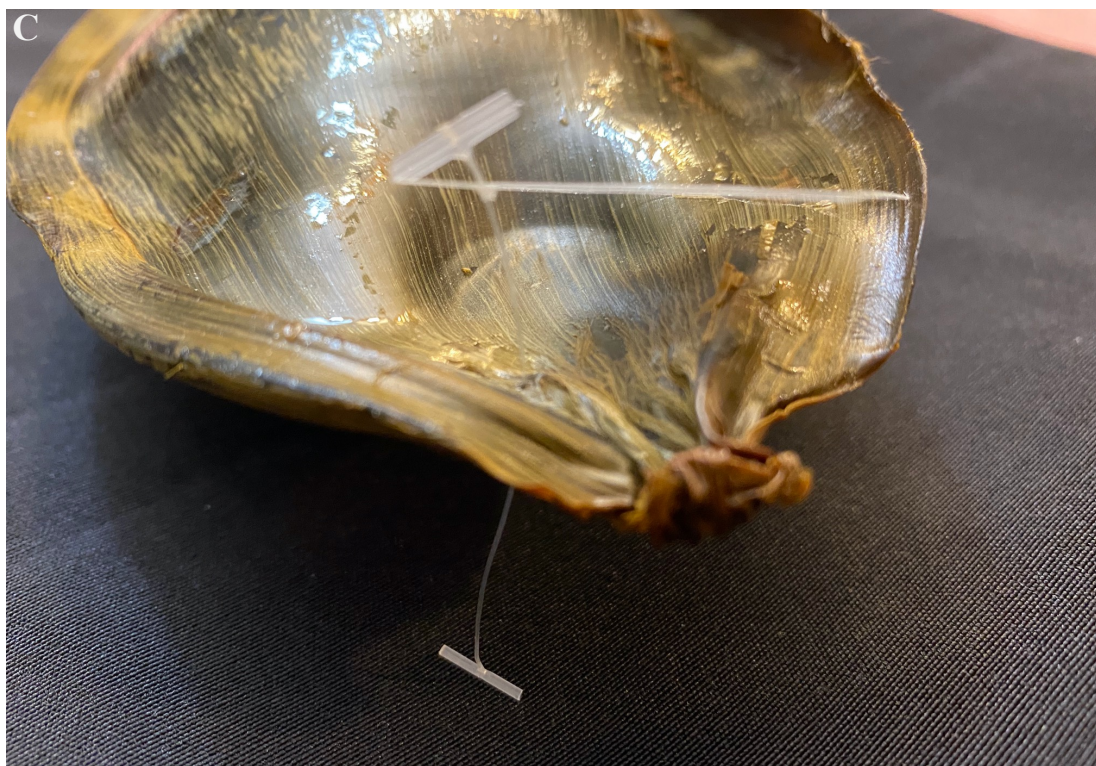

Supplement: Data_Sheet_1.zip [file Data_Sheet_1.zip]

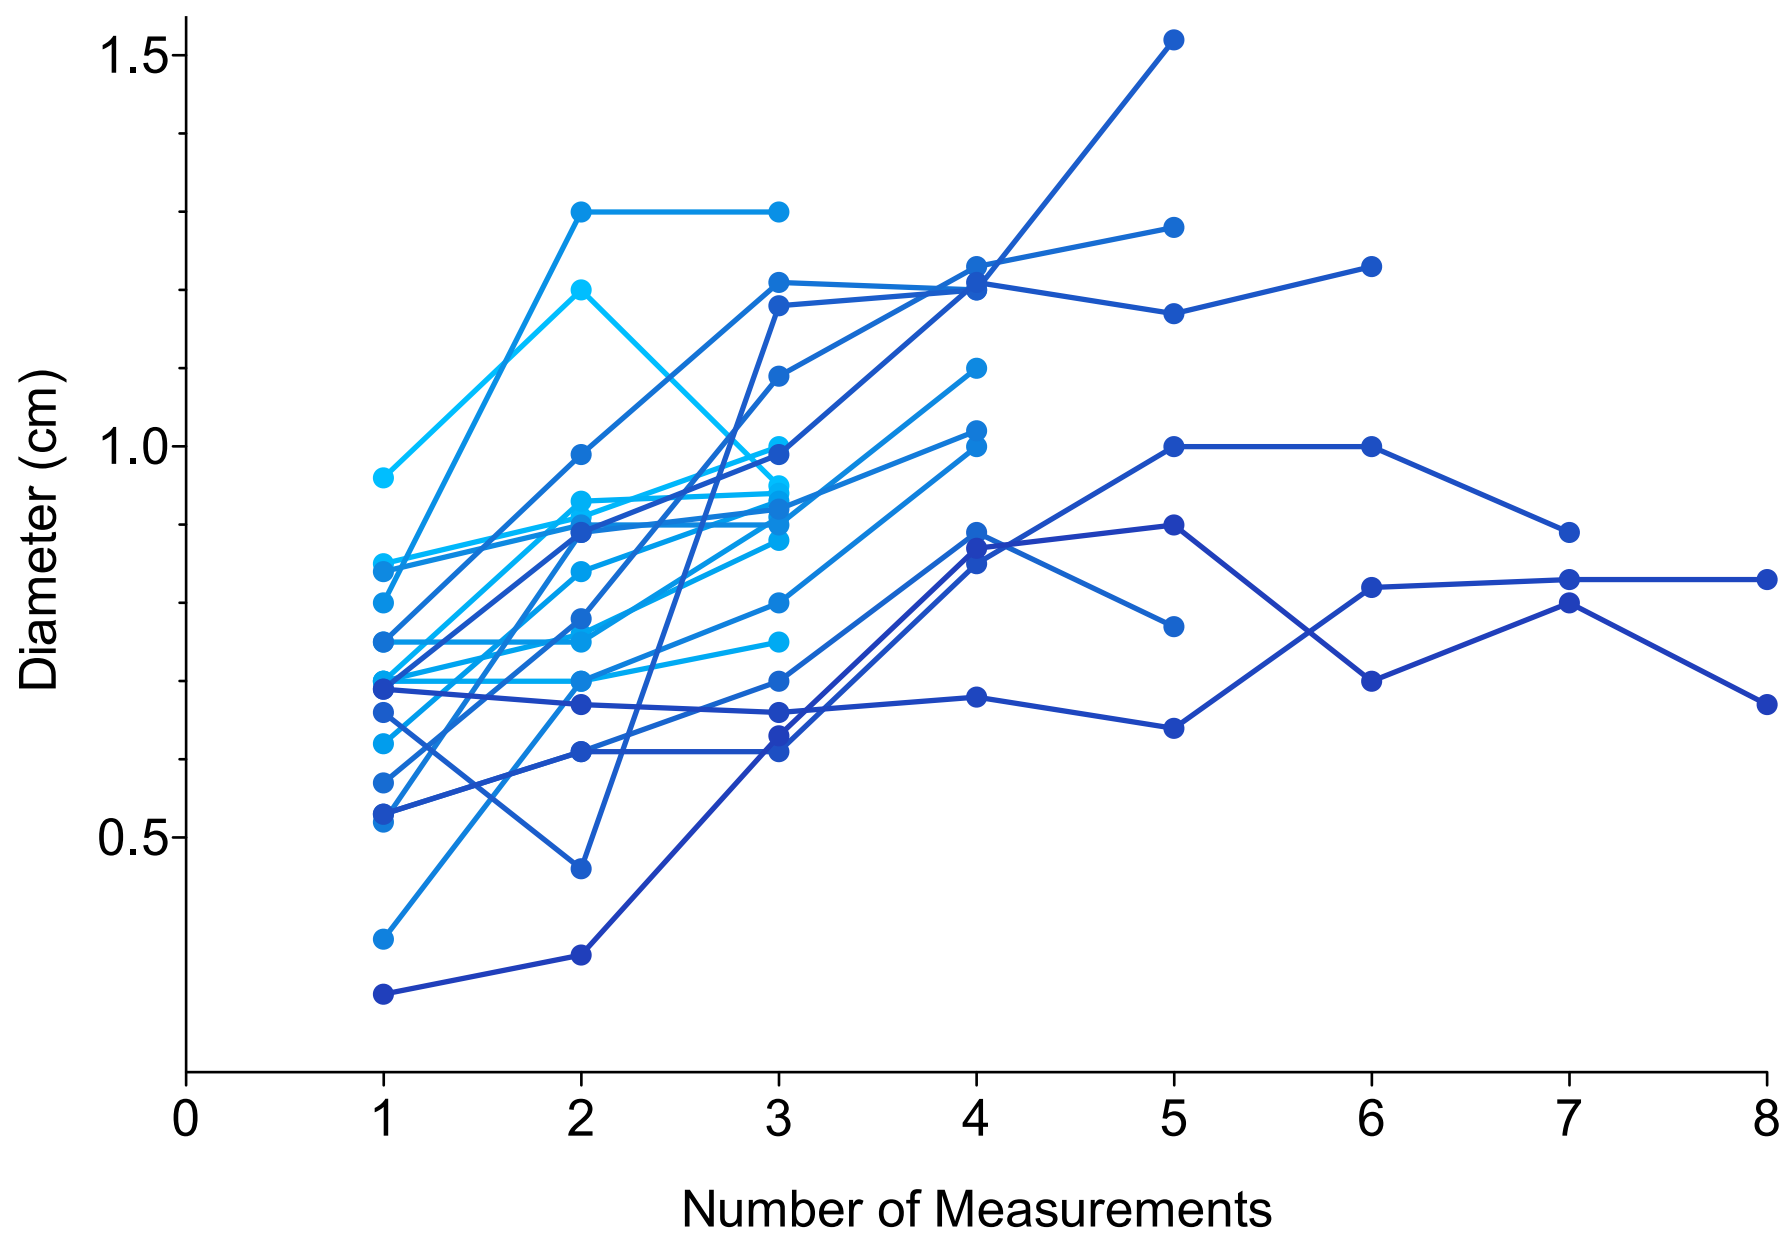

Supplement: Data_Sheet_1.zip [file Data_Sheet_1.zip]

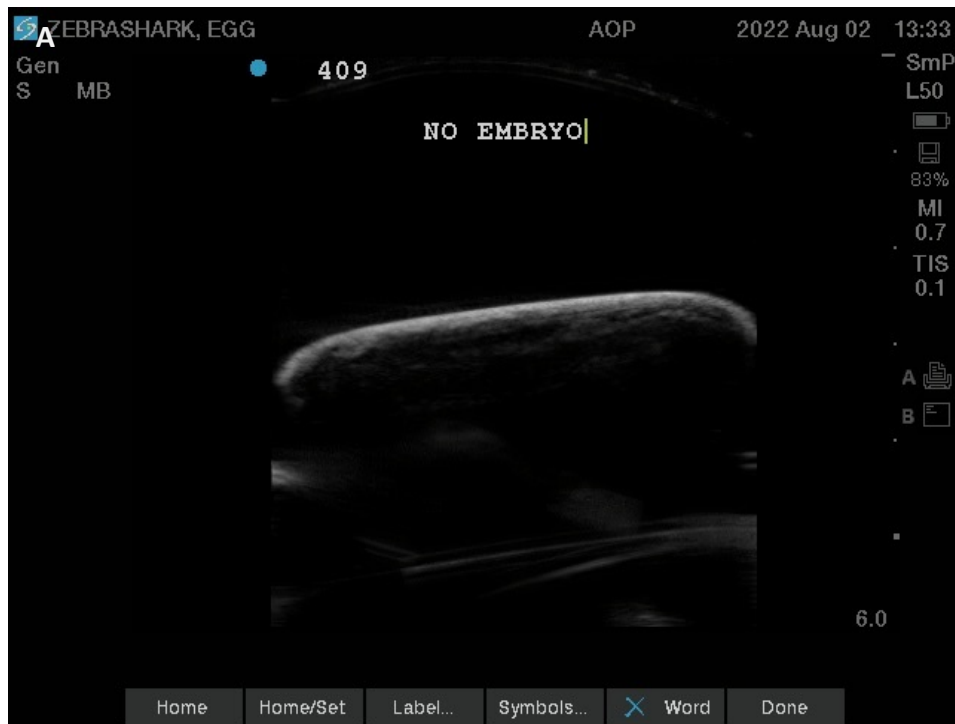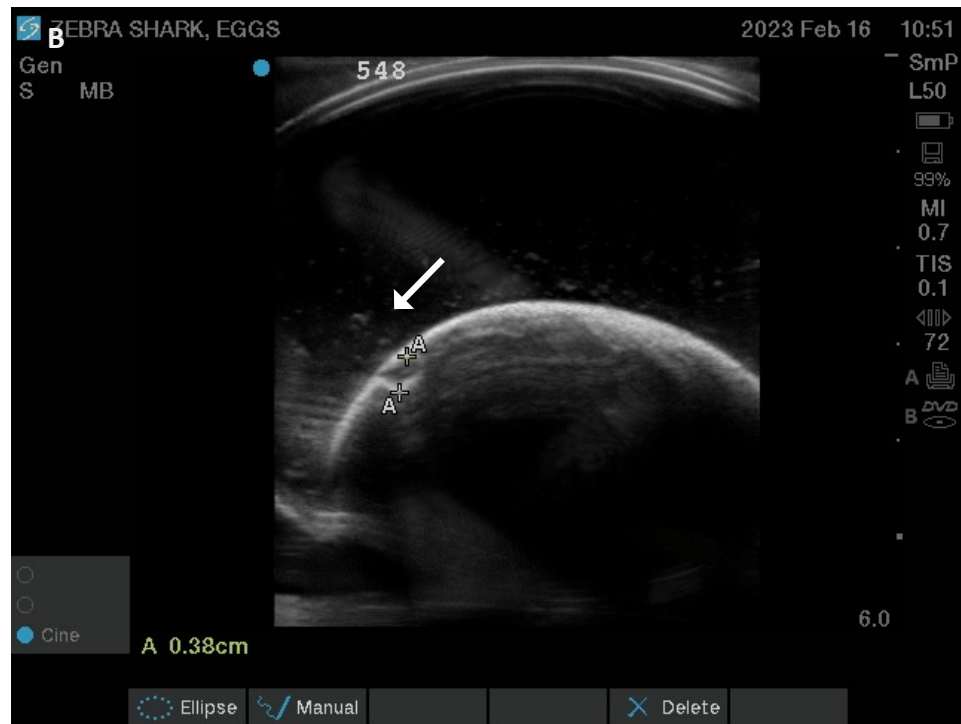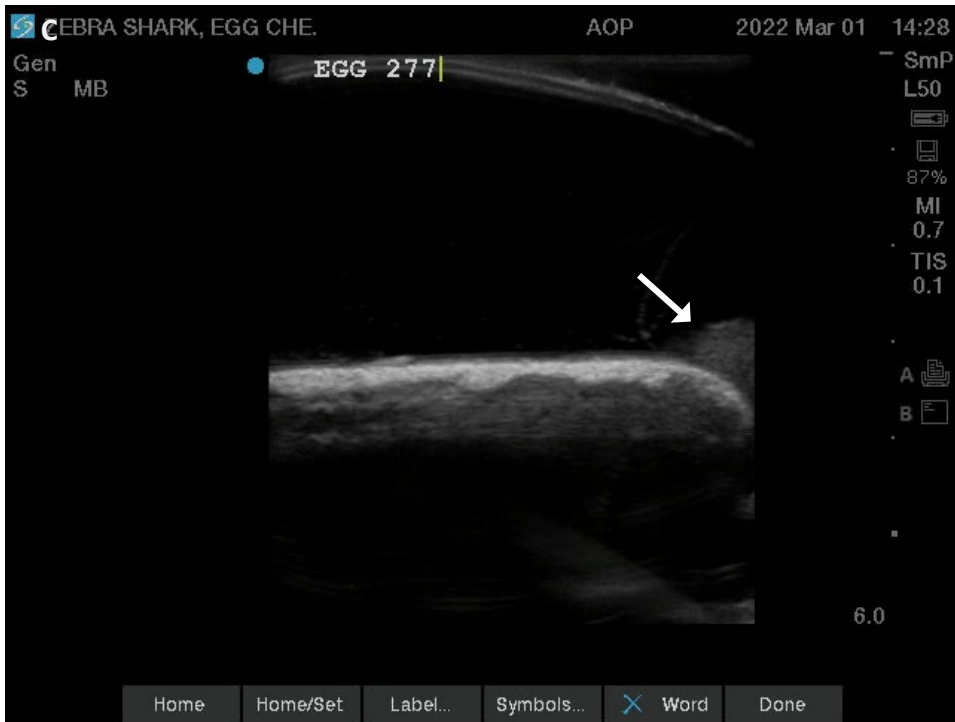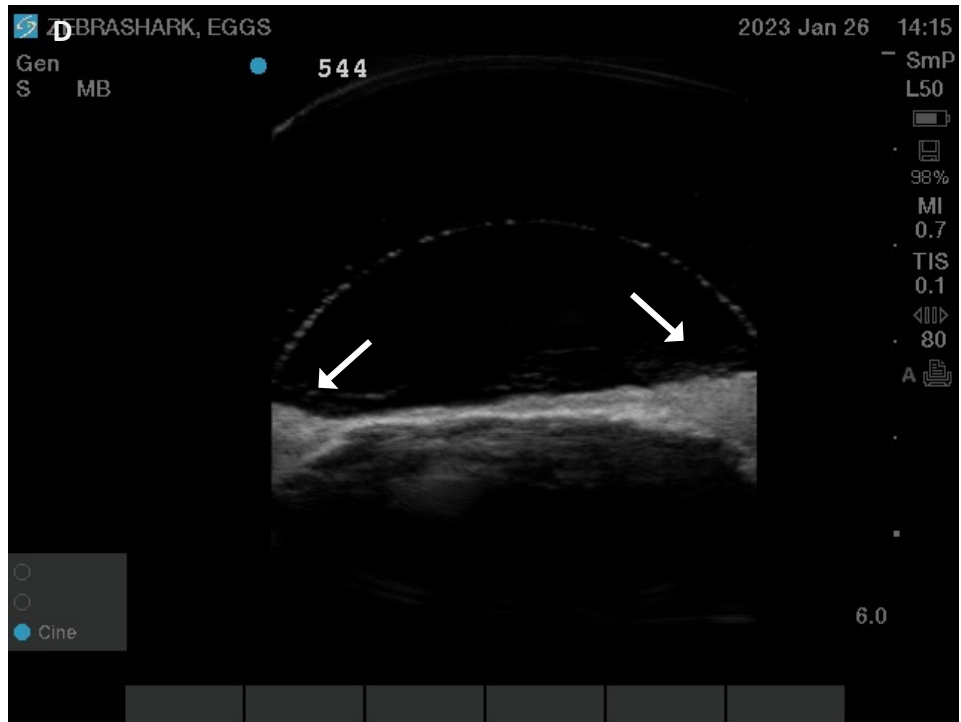

Supplement: Data_Sheet_1.zip [file Data_Sheet_1.zip]
